# Supplementary material for: Non-Cryogenic Structure and Dynamics of HIV-1 Integrase Catalytic Core Domain by X-ray Free-Electron Lasers
Source: PubMed Central journal article supplement (PMC6514806; doi:10.3390/ijms20081943), 2019-04-20
Supplement: ijms-20-01943-s001.pdf [file ijms-20-01943-s001.pdf]

# Non-cryogenic structure and dynamics of HIV-1 integrase catalytic core domain by X-ray free-electron lasers

Jae-Hyun Park <sup>1†</sup>, Ji-Hye Yun <sup>1†</sup>, Yingchen Shi <sup>2,3</sup>, Jeongmin Han <sup>1</sup>, Xuanxuan Li <sup>2,3</sup>, Zeyu Jin <sup>1</sup>, Taehee Kim <sup>1</sup>, Jaehyun Park <sup>4</sup>, Sehan Park <sup>4</sup>, Haiguang Liu <sup>2,\*</sup> and Weontae Lee <sup>1,\*</sup>

<sup>1</sup> Structural Biochemistry & Molecular Biophysics Laboratory, Department of Biochemistry, College of Life Science & Biotechnology, Yonsei University, Seoul, Republic of Korea; wtlee@yonsei.ac.kr

<sup>2</sup> Complex Systems Division, Beijing Computational Science Research Center, Beijing, China 100193;

<sup>3</sup> Department of Engineering Physics, Tsinghua University, Beijing, China 100084;

<sup>4</sup> Pohang Accelerator Laboratory, Pohang, Gyeongbuk, Republic of Korea; jaehyun.park@postech.ac.kr

\* Correspondence: [hgliu@csrc.ac.cn](mailto:hgliu@csrc.ac.cn) (H.L.) and [wtlee@yonsei.ac.kr](mailto:wtlee@yonsei.ac.kr) (W.L.)

† These authors contributed equally.

## Supplementary Materials

Table S1. DPI analysis for non-cryogenic and cryogenic structures of IN-CCD.

Figure S1. Diffraction images of IN-CCD collected in PAL-XFEL using MX225-HS.

Figure S2. Superimposed images of helix III of HIV-1 integrase/DNA complex (5U1C) together with non-cryogenic and cryogenic IN-CCD structure.

Figure S3. Putty presentation of HIV-1 integrase catalytic core domain structure bound and non-bound with DNA.

Figure S4. The B-factor comparison of the DDE triad in the non-cryogenic, cryogenic and other known structures of HIV-1 IN-CCD.

**Table S1. DPI analysis for non-cryogenic and cryogenic structures of IN-CCD.**

| <b>Residue</b> | <b>DPI of non-cryogenic structure (Å)</b> | <b>DPI of cryogenic structure (Å)</b> | <b>The positional shift in experimental data (Å)/(°)</b> |
|----------------|-------------------------------------------|---------------------------------------|----------------------------------------------------------|
| Glu168         | 0.25(0.26)                                | 0.21(0.228)                           | 1.05(CD) ,15.21                                          |
| Glu170         | 0.27(0.285)                               | 0.21(0.201)                           | 4.53(CD), 71.72                                          |
| Tyr194         | 0.26(0.294)                               | 0.21(0.253)                           | 1.72(OH), 14.72                                          |
| Arg187         | 0.27(0.291)                               | 0.21(0.243)                           | 1.26(NH1)                                                |
| Arg199         | 0.22(0.272)                               | 0.18(0.199)                           | 0.77(NH1)                                                |
| Tyr83          | 0.17(0.163)                               | 0.14(0.161)                           | 0.77(OH), 7.82                                           |
| Lys185         | 0.20(0.197)                               | 0.15(0.181)                           | 2.25(NZ)                                                 |
| His114         | 0.20(0.216)                               | 0.16(0.163)                           | 0.66(CE1), 6.4                                           |
| Phe121         | 0.18(0.177)                               | 0.18(0.199)                           | 0.57(CZ) *                                               |
| Asn155         | 0.25(0.248)                               | 0.21(0.219)                           | 1.53(ND2) *                                              |
| Asp64          | 0.20(0.223)                               | 0.16(0.171)                           | 0.83(OD2), 18.85                                         |
| Asn120         | 0.18(0.187)                               | 0.18(0.191)                           | 1.71(OD1) *                                              |
| Tyr99          | 0.18(0.201)                               | 0.15(0.173)                           | 0.54(OH), 4.57                                           |
| Glu87          | 0.20(0.211)                               | 0.18(0.204)                           | 0.68(OE2), 9.19                                          |
| Glu92          | 0.20(0.205)                               | 0.19(0.203)                           | 0.82(CD)                                                 |
| Glu96          | 0.19(0.199)                               | 0.16(0.178)                           | 0.52(OE1)                                                |
| Gln95          | 0.22(0.263)                               | 0.18(0.222)                           | 0.63(CD) *                                               |

Values in parentheses are for specific atom used to measure positional shift.

Second values in 'The positional shift in experimental data' column are for angular change.

\* The positional shift also appears in the backbone.

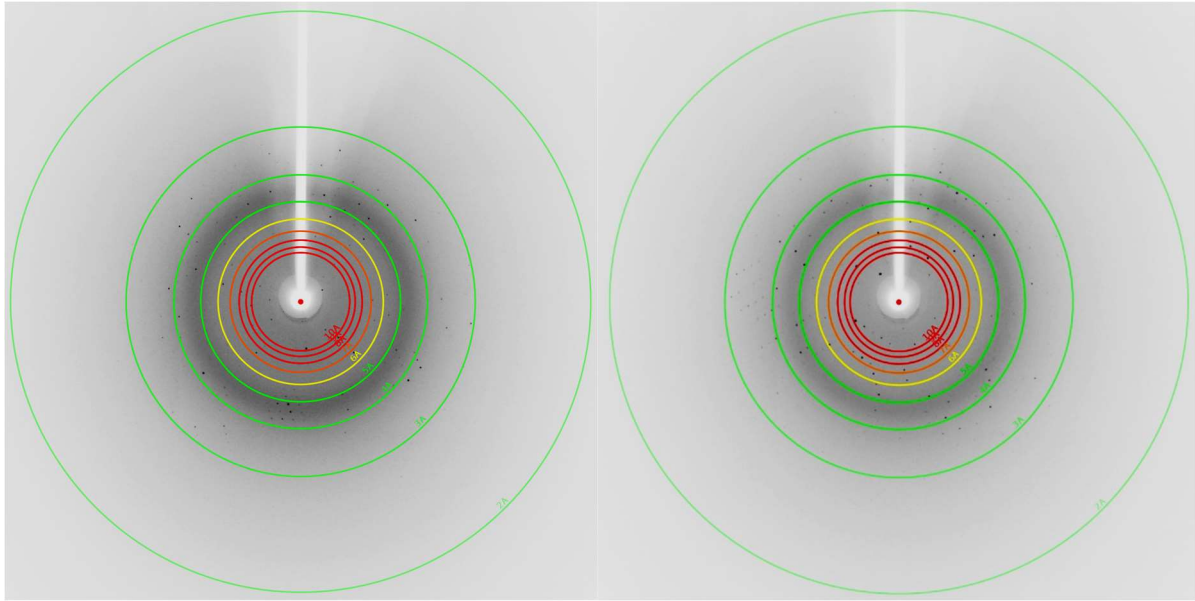

**Figure S1.** Diffraction images of IN-CCD collected in PAL-XFEL using MX225-HS. Diffraction spots from IN-CCD crystals extending to beyond 2.8Å resolution, with unit-cell parameter  $a=b=73.275$  Å,  $c=66.71$  Å,  $\alpha=\beta=90^\circ$ ,  $\gamma=120^\circ$

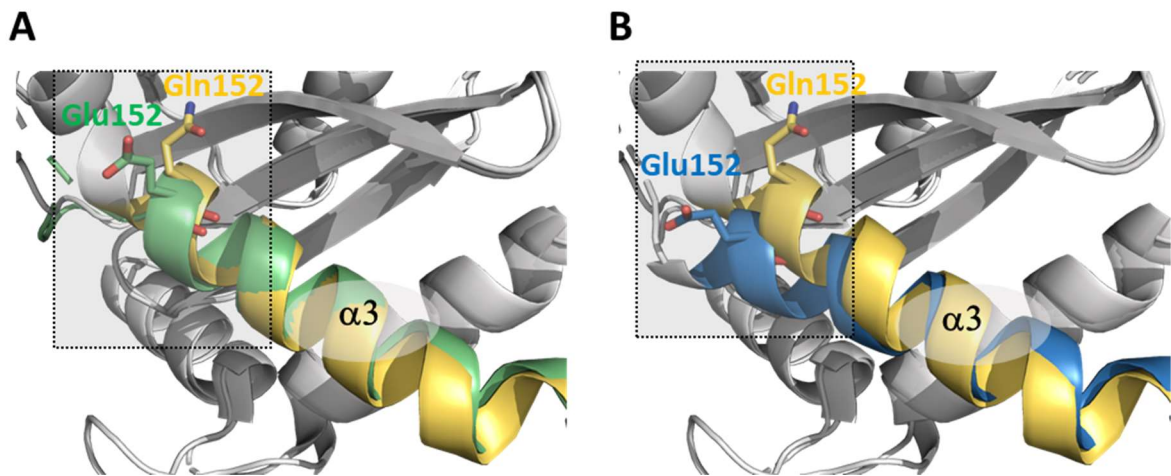

**Figure S2.** Superimposed images of helix III of HIV-1 integrase/DNA complex (5U1C) together with non-cryogenic and cryogenic IN-CCD structure. (A) Overlap representation of non-cryogenic (Green) and 5U1C (Yellow) structures. (B) Overlap representation of cryogenic (Blue) and 5U1C structures. 5U1C is a structure of HIV-1 integrase/DNA complex.

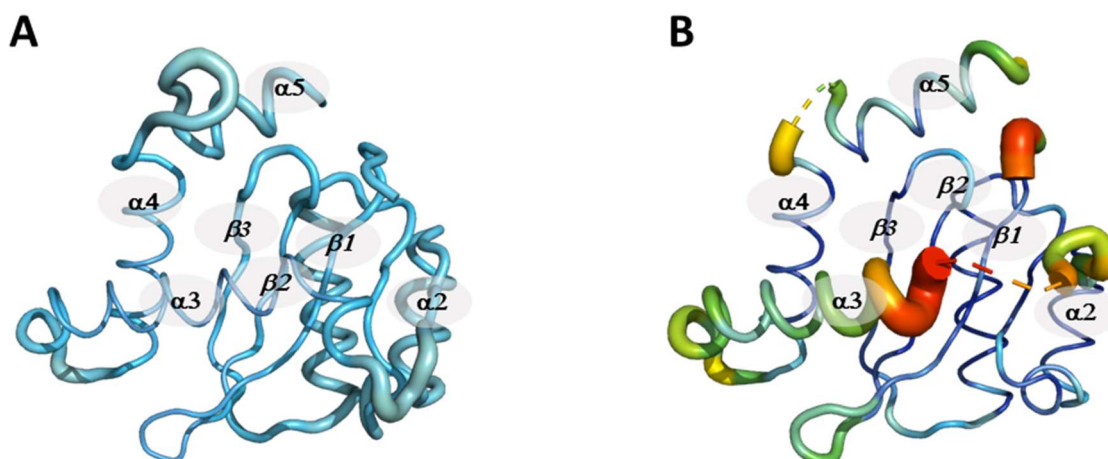

Figure S3. Putty presentation of HIV-1 integrase catalytic core domain structure bound and non-bound with DNA. (A) Atomic displacement parameter: color-coded B-factor distribution of the HIV-1 integrase catalytic core domain extracted from 5U1C. (B) Color-coded B-factor distribution of the HIV-1 integrase catalytic core domain of the non-cryogenic crystal structure.

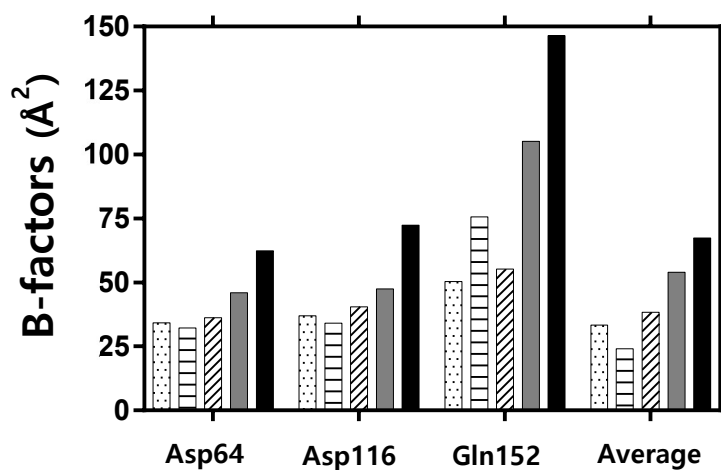

Figure S4. The B-factor comparison of the DDE triad in the non-cryogenic, cryogenic and other known structures of HIV-1 IN-CCD. The B-factor values of the DDE triad (Asp64, Asp116, and Gln152) and the average B-factors of all protein atom represented in a plot. (1BL3 (□); 1BIS (≡); 1BI4 (▨); Cryogenic structure (■), and Non-cryogenic structure (■)).
